# Supplementary material for: Influence of Fucoidans on Hemostatic System
Source: MDPI journal article supplement (doi:10.3390/md11072444), 2013-07-12
Supplement: s1 [file s1]

marinedrugs-11-02444-s001.mol
  corina  04141405523D 1   1.00000     0.00000 
CORINA 3.49 0023  12.04.2013
 52 56  0  0  0  0  0  0  0  0999 V2000
   -0.0187    1.5267    0.0104 C   0  0  0  0  0  0  0  0  0  0  0  0
    0.0021   -0.0041    0.0020 C   0  0  0  0  0  0  0  0  0  0  0  0
    0.7722   -0.4897   -1.2298 C   0  0  0  0  0  0  0  0  0  0  0  0
    2.1813    0.1106   -1.2068 C   0  0  0  0  0  0  0  0  0  0  0  0
    2.0763    1.6370   -1.1517 C   0  0  0  0  0  0  0  0  0  0  0  0
    1.3225    2.0200    0.0003 O   0  0  0  0  0  0  0  0  0  0  0  0
   -1.3374   -0.4996   -0.0463 O   0  0  0  0  0  0  0  0  0  0  0  0
   -0.3562   -2.8128   -4.5152 C   0  0  0  0  0  0  0  0  0  0  0  0
   -0.1916   -4.3335   -4.4518 C   0  0  0  0  0  0  0  0  0  0  0  0
    1.1278   -4.6676   -3.7490 C   0  0  0  0  0  0  0  0  0  0  0  0
    1.1303   -4.0242   -2.3590 C   0  0  0  0  0  0  0  0  0  0  0  0
    0.9147   -2.5154   -2.5032 C   0  0  0  0  0  0  0  0  0  0  0  0
   -0.3141   -2.2749   -3.1919 O   0  0  0  0  0  0  0  0  0  0  0  0
    0.8598   -1.9159   -1.2072 O   0  0  0  0  0  0  0  0  0  0  0  0
   -0.1754   -4.8677   -5.7771 O   0  0  0  0  0  0  0  0  0  0  0  0
    1.6896   -7.1352   -7.0746 C   0  0  0  0  0  0  0  0  0  0  0  0
    1.8712   -8.6415   -6.8701 C   0  0  0  0  0  0  0  0  0  0  0  0
    2.7481   -8.8794   -5.6369 C   0  0  0  0  0  0  0  0  0  0  0  0
    2.1004   -8.2021   -4.4252 C   0  0  0  0  0  0  0  0  0  0  0  0
    1.9099   -6.7128   -4.7241 C   0  0  0  0  0  0  0  0  0  0  0  0
    1.1116   -6.5626   -5.8998 O   0  0  0  0  0  0  0  0  0  0  0  0
    2.5021   -9.2070   -8.0209 O   0  0  0  0  0  0  0  0  0  0  0  0
    1.2550   -6.0851   -3.6199 O   0  0  0  0  0  0  0  0  0  0  0  0
    6.4633  -10.7280   -5.1433 C   0  0  0  0  0  0  0  0  0  0  0  0
    6.5216  -12.2265   -4.8355 C   0  0  0  0  0  0  0  0  0  0  0  0
    5.4009  -12.5821   -3.8537 C   0  0  0  0  0  0  0  0  0  0  0  0
    4.0565  -12.1646   -4.4575 C   0  0  0  0  0  0  0  0  0  0  0  0
    4.0934  -10.6685   -4.7799 C   0  0  0  0  0  0  0  0  0  0  0  0
    5.1768  -10.4015   -5.6728 O   0  0  0  0  0  0  0  0  0  0  0  0
    7.7866  -12.5453   -4.2521 O   0  0  0  0  0  0  0  0  0  0  0  0
    2.8626  -10.2831   -5.3953 O   0  0  0  0  0  0  0  0  0  0  0  0
    0.3528   -4.6146   -0.1699 C   0  0  0  0  0  0  0  0  0  0  0  0
    1.4499   -5.4953    0.0811 O   0  0  0  0  0  0  0  0  0  0  0  0
    1.8269   -5.5803    1.4569 C   0  0  0  0  0  0  0  0  0  0  0  0
    0.6501   -6.1187    2.2747 C   0  0  0  0  0  0  0  0  0  0  0  0
   -0.5607   -5.2014    2.0775 C   0  0  0  0  0  0  0  0  0  0  0  0
   -0.8833   -5.1142    0.5826 C   0  0  0  0  0  0  0  0  0  0  0  0
    0.0773   -4.5840   -1.5717 O   0  0  0  0  0  0  0  0  0  0  0  0
    1.0050   -6.1502    3.6586 O   0  0  0  0  0  0  0  0  0  0  0  0
    3.4790    2.2422   -1.0679 C   0  0  0  0  0  0  0  0  0  0  0  0
   -1.9660   -4.2039    0.3800 O   0  0  0  0  0  0  0  0  0  0  0  0
   -1.6851   -5.7365    2.7787 O   0  0  0  0  0  0  0  0  0  0  0  0
    2.8849   -0.2773   -2.3885 O   0  0  0  0  0  0  0  0  0  0  0  0
    3.8207  -12.9058   -5.6563 O   0  0  0  0  0  0  0  0  0  0  0  0
    5.4018  -13.9915   -3.6174 O   0  0  0  0  0  0  0  0  0  0  0  0
    4.9354  -14.3634   -2.3189 C   0  0  0  0  0  0  0  0  0  0  0  0
    0.8304   -8.8031   -4.1644 O   0  0  0  0  0  0  0  0  0  0  0  0
   -0.7583    2.0338   -1.2292 C   0  0  0  0  0  0  0  0  0  0  0  0
    0.7783   -2.2110   -5.3469 C   0  0  0  0  0  0  0  0  0  0  0  0
    3.0505   -6.4887   -7.3408 C   0  0  0  0  0  0  0  0  0  0  0  0
    6.7026   -9.9334   -3.8579 C   0  0  0  0  0  0  0  0  0  0  0  0
    3.0225   -6.5241    1.6009 C   0  0  0  0  0  0  0  0  0  0  0  0
  1  2  1  0      
  5  6  1  0      
  6  1  1  0      
  2  7  1  0      
  8  9  1  0      
 12 13  1  0      
 13  8  1  0      
 12 14  1  0      
  3 14  1  0      
  9 15  1  0      
 16 17  1  0      
 20 21  1  0      
 21 16  1  0      
 17 22  1  0      
 20 23  1  0      
 10 23  1  0      
 24 25  1  0      
 28 29  1  0      
 29 24  1  0      
 25 30  1  0      
 28 31  1  0      
 18 31  1  0      
 35 36  1  0      
 36 37  1  0      
 37 32  1  0      
 32 38  1  0      
 35 39  1  0      
 11 38  1  0      
  5 40  1  0      
 37 41  1  0      
 36 42  1  0      
  4 43  1  0      
 27 44  1  0      
 26 45  1  0      
 45 46  1  0      
 19 47  1  0      
 25 26  1  0      
 28 27  1  0      
 26 27  1  0      
 17 18  1  0      
 18 19  1  0      
 20 19  1  0      
  9 10  1  0      
 10 11  1  0      
 12 11  1  0      
  2  3  1  0      
  3  4  1  0      
  4  5  1  0      
 32 33  1  0      
 35 34  1  0      
 34 33  1  0      
  1 48  1  0      
  8 49  1  0      
 16 50  1  0      
 24 51  1  0      
 34 52  1  0      
M  STY  1   1 SUP
M  SLB  1   1   1
M  SAL   1  1  48
M  SBL   1  1  52
M  SMT   1 Me
M  SBV   1 52   -8.6067    5.6481
M  STY  1   2 SUP
M  SLB  1   2   2
M  SAL   2  1  49
M  SBL   2  1  53
M  SMT   2 Me
M  SBV   2 53   -8.6878    5.8461
M  STY  1   3 SUP
M  SLB  1   3   3
M  SAL   3  1  50
M  SBL   3  1  54
M  SMT   3 Me
M  SBV   3 54   -8.6880    5.8468
M  STY  1   4 SUP
M  SLB  1   4   4
M  SAL   4  1  51
M  SBL   4  1  55
M  SMT   4 Me
M  SBV   4 55   -8.6880    5.8468
M  STY  1   5 SUP
M  SLB  1   5   5
M  SAL   5  1  52
M  SBL   5  1  56
M  SMT   5 Me
M  SBV   5 56   -7.4784    5.3452
M  END
$$$$
