# Supplementary material for: Influence of Fucoidans on Hemostatic System
Source: MDPI journal article supplement (doi:10.3390/md11072444), 2013-07-12
Supplement: s2 [file s2]

marinedrugs-11-02444-s001.mol
  ChemDraw01201408372D

 52 56  0  0  0  0  0  0  0  0999 V2000
    1.4724    3.7275    0.0000 C   0  0  0  0  0  0  0  0  0  0  0  0
    1.0599    3.0131    0.0000 C   0  0  0  0  0  0  0  0  0  0  0  0
    1.8532    3.2398    0.0000 C   0  0  0  0  0  0  0  0  0  0  0  0
    2.6512    3.0131    0.0000 C   0  0  0  0  0  0  0  0  0  0  0  0
    3.0638    3.7275    0.0000 C   0  0  0  0  0  0  0  0  0  0  0  0
    2.2705    3.5009    0.0000 O   0  0  0  0  0  0  0  0  0  0  0  0
    1.0599    2.1881    0.0000 O   0  0  0  0  0  0  0  0  0  0  0  0
   -0.1157    1.6857    0.0000 C   0  0  0  0  0  0  0  0  0  0  0  0
   -0.5282    0.9712    0.0000 C   0  0  0  0  0  0  0  0  0  0  0  0
    0.2650    1.1979    0.0000 C   0  0  0  0  0  0  0  0  0  0  0  0
    1.0631    0.9712    0.0000 C   0  0  0  0  0  0  0  0  0  0  0  0
    1.4757    1.6857    0.0000 C   0  0  0  0  0  0  0  0  0  0  0  0
    0.6824    1.4590    0.0000 O   0  0  0  0  0  0  0  0  0  0  0  0
    1.4757    2.5107    0.0000 O   0  0  0  0  0  0  0  0  0  0  0  0
   -0.5282    0.1462    0.0000 O   0  0  0  0  0  0  0  0  0  0  0  0
   -1.7228   -0.3803    0.0000 C   0  0  0  0  0  0  0  0  0  0  0  0
   -2.1353   -1.0948    0.0000 C   0  0  0  0  0  0  0  0  0  0  0  0
   -1.3421   -0.8681    0.0000 C   0  0  0  0  0  0  0  0  0  0  0  0
   -0.5440   -1.0948    0.0000 C   0  0  0  0  0  0  0  0  0  0  0  0
   -0.1314   -0.3803    0.0000 C   0  0  0  0  0  0  0  0  0  0  0  0
   -0.9248   -0.6069    0.0000 O   0  0  0  0  0  0  0  0  0  0  0  0
   -2.1353   -1.9198    0.0000 O   0  0  0  0  0  0  0  0  0  0  0  0
   -0.1314    0.4447    0.0000 O   0  0  0  0  0  0  0  0  0  0  0  0
   -3.2491   -2.5253    0.0000 C   0  0  0  0  0  0  0  0  0  0  0  0
   -3.6616   -3.2398    0.0000 C   0  0  0  0  0  0  0  0  0  0  0  0
   -2.8683   -3.0131    0.0000 C   0  0  0  0  0  0  0  0  0  0  0  0
   -2.0703   -3.2398    0.0000 C   0  0  0  0  0  0  0  0  0  0  0  0
   -1.6577   -2.5253    0.0000 C   0  0  0  0  0  0  0  0  0  0  0  0
   -2.4510   -2.7519    0.0000 O   0  0  0  0  0  0  0  0  0  0  0  0
   -3.6616   -4.0648    0.0000 O   0  0  0  0  0  0  0  0  0  0  0  0
   -1.6577   -1.7003    0.0000 O   0  0  0  0  0  0  0  0  0  0  0  0
    1.6580    0.4300    0.0000 C   0  0  0  0  0  0  0  0  0  0  0  0
    2.0705   -0.2845    0.0000 O   0  0  0  0  0  0  0  0  0  0  0  0
    2.8686   -0.0754    0.0000 C   0  0  0  0  0  0  0  0  0  0  0  0
    3.6619   -0.2845    0.0000 C   0  0  0  0  0  0  0  0  0  0  0  0
    3.2494    0.4300    0.0000 C   0  0  0  0  0  0  0  0  0  0  0  0
    2.4513    0.2210    0.0000 C   0  0  0  0  0  0  0  0  0  0  0  0
    1.6580    1.2550    0.0000 O   0  0  0  0  0  0  0  0  0  0  0  0
    3.6619   -1.1095    0.0000 O   0  0  0  0  0  0  0  0  0  0  0  0
    3.0638    4.5525    0.0000 C   0  0  0  0  0  0  0  0  0  0  0  0
    2.0388    0.9355    0.0000 O   0  0  0  0  0  0  0  0  0  0  0  0
    4.0463    0.2165    0.0000 O   0  0  0  0  0  0  0  0  0  0  0  0
    3.4481    3.2266    0.0000 O   0  0  0  0  0  0  0  0  0  0  0  0
   -1.2734   -3.0262    0.0000 O   0  0  0  0  0  0  0  0  0  0  0  0
   -3.2808   -3.7275    0.0000 O   0  0  0  0  0  0  0  0  0  0  0  0
   -3.2808   -4.5525    0.0000 C   0  0  0  0  0  0  0  0  0  0  0  0
    0.2529   -0.8812    0.0000 O   0  0  0  0  0  0  0  0  0  0  0  0
    0.7566    3.3162    0.0000 C   0  0  0  0  0  0  0  0  0  0  0  0
   -0.9127    1.4724    0.0000 C   0  0  0  0  0  0  0  0  0  0  0  0
   -2.5201   -0.5929    0.0000 C   0  0  0  0  0  0  0  0  0  0  0  0
   -4.0463   -2.7379    0.0000 C   0  0  0  0  0  0  0  0  0  0  0  0
    3.2811   -0.7895    0.0000 C   0  0  0  0  0  0  0  0  0  0  0  0
  1  2  1  0      
  5  6  1  0      
  6  1  1  0      
  2  7  1  0      
  8  9  1  0      
 12 13  1  0      
 13  8  1  0      
 12 14  1  0      
  3 14  1  0      
  9 15  1  0      
 16 17  1  0      
 20 21  1  0      
 21 16  1  0      
 17 22  1  0      
 20 23  1  0      
 10 23  1  0      
 24 25  1  0      
 28 29  1  0      
 29 24  1  0      
 25 30  1  0      
 28 31  1  0      
 18 31  1  0      
 35 36  1  0      
 36 37  1  0      
 37 32  1  0      
 32 38  1  0      
 35 39  1  0      
 11 38  1  0      
  5 40  1  0      
 37 41  1  0      
 36 42  1  0      
  4 43  1  0      
 27 44  1  0      
 26 45  1  0      
 45 46  1  0      
 19 47  1  0      
 25 26  1  1      
 28 27  1  1      
 26 27  1  1      
 17 18  1  1      
 18 19  1  1      
 20 19  1  1      
  9 10  1  1      
 10 11  1  1      
 12 11  1  1      
  2  3  1  1      
  3  4  1  1      
  4  5  1  1      
 32 33  1  1      
 35 34  1  1      
 34 33  1  1      
  1 48  1  0      
  8 49  1  0      
 16 50  1  0      
 24 51  1  0      
 34 52  1  0      
M  STY  1   1 SUP
M  SLB  1   1   1
M  SAL   1  1  48
M  SBL   1  1  52
M  SMT   1 Me
M  SBV   1 52   -8.6067    5.6481
M  STY  1   2 SUP
M  SLB  1   2   2
M  SAL   2  1  49
M  SBL   2  1  53
M  SMT   2 Me
M  SBV   2 53   -8.6878    5.8461
M  STY  1   3 SUP
M  SLB  1   3   3
M  SAL   3  1  50
M  SBL   3  1  54
M  SMT   3 Me
M  SBV   3 54   -8.6880    5.8468
M  STY  1   4 SUP
M  SLB  1   4   4
M  SAL   4  1  51
M  SBL   4  1  55
M  SMT   4 Me
M  SBV   4 55   -8.6880    5.8468
M  STY  1   5 SUP
M  SLB  1   5   5
M  SAL   5  1  52
M  SBL   5  1  56
M  SMT   5 Me
M  SBV   5 56   -7.4784    5.3452
M  END
