# Supplementary material for: Influence of Fucoidans on Hemostatic System
Source: MDPI journal article supplement (doi:10.3390/md11072444), 2013-07-12
Supplement: s3 [file s3]

marinedrugs-11-02444-s002.mol
  corina  04141405523D 1   1.00000     0.00000 
CORINA 3.49 0023  12.04.2013
 42 45  0  0  0  0  0  0  0  0999 V2000
   -0.0187    1.5267    0.0104 C   0  0  0  0  0  0  0  0  0  0  0  0
    0.0021   -0.0041    0.0020 C   0  0  0  0  0  0  0  0  0  0  0  0
    0.7722   -0.4897   -1.2298 C   0  0  0  0  0  0  0  0  0  0  0  0
    2.1813    0.1106   -1.2068 C   0  0  0  0  0  0  0  0  0  0  0  0
    2.0763    1.6370   -1.1517 C   0  0  0  0  0  0  0  0  0  0  0  0
    1.3225    2.0200    0.0003 O   0  0  0  0  0  0  0  0  0  0  0  0
   -1.3374   -0.4996   -0.0463 O   0  0  0  0  0  0  0  0  0  0  0  0
   -0.3562   -2.8128   -4.5152 C   0  0  0  0  0  0  0  0  0  0  0  0
   -0.1916   -4.3335   -4.4518 C   0  0  0  0  0  0  0  0  0  0  0  0
    1.1278   -4.6676   -3.7490 C   0  0  0  0  0  0  0  0  0  0  0  0
    1.1303   -4.0242   -2.3590 C   0  0  0  0  0  0  0  0  0  0  0  0
    0.9147   -2.5154   -2.5032 C   0  0  0  0  0  0  0  0  0  0  0  0
   -0.3141   -2.2749   -3.1919 O   0  0  0  0  0  0  0  0  0  0  0  0
    0.8598   -1.9159   -1.2072 O   0  0  0  0  0  0  0  0  0  0  0  0
   -0.1754   -4.8677   -5.7771 O   0  0  0  0  0  0  0  0  0  0  0  0
   -3.3045   -6.7169   -5.8984 C   0  0  0  0  0  0  0  0  0  0  0  0
   -3.2571   -7.2185   -7.3441 C   0  0  0  0  0  0  0  0  0  0  0  0
   -2.7219   -6.1022   -8.2462 C   0  0  0  0  0  0  0  0  0  0  0  0
   -1.3449   -5.6653   -7.7370 C   0  0  0  0  0  0  0  0  0  0  0  0
   -1.4662   -5.2237   -6.2761 C   0  0  0  0  0  0  0  0  0  0  0  0
   -1.9984   -6.2976   -5.4980 O   0  0  0  0  0  0  0  0  0  0  0  0
   -4.5724   -7.5842   -7.7661 O   0  0  0  0  0  0  0  0  0  0  0  0
    1.2550   -6.0851   -3.6199 O   0  0  0  0  0  0  0  0  0  0  0  0
   -4.4010   -4.0498  -11.4761 C   0  0  0  0  0  0  0  0  0  0  0  0
   -4.1990   -4.5881  -12.8949 C   0  0  0  0  0  0  0  0  0  0  0  0
   -2.7655   -5.1091  -13.0358 C   0  0  0  0  0  0  0  0  0  0  0  0
   -2.5151   -6.1779  -11.9674 C   0  0  0  0  0  0  0  0  0  0  0  0
   -2.7821   -5.5782  -10.5844 C   0  0  0  0  0  0  0  0  0  0  0  0
   -4.1223   -5.0850  -10.5312 O   0  0  0  0  0  0  0  0  0  0  0  0
   -4.4209   -3.5392  -13.8397 O   0  0  0  0  0  0  0  0  0  0  0  0
   -2.6049   -6.5851   -9.5861 O   0  0  0  0  0  0  0  0  0  0  0  0
    0.0773   -4.5840   -1.5717 O   0  0  0  0  0  0  0  0  0  0  0  0
    3.4790    2.2422   -1.0679 C   0  0  0  0  0  0  0  0  0  0  0  0
    2.8849   -0.2773   -2.3885 O   0  0  0  0  0  0  0  0  0  0  0  0
   -3.3917   -7.2852  -12.1851 O   0  0  0  0  0  0  0  0  0  0  0  0
   -2.5898   -5.6803  -14.3338 O   0  0  0  0  0  0  0  0  0  0  0  0
   -1.2564   -5.5793  -14.8377 C   0  0  0  0  0  0  0  0  0  0  0  0
   -0.4316   -6.7603   -7.8306 O   0  0  0  0  0  0  0  0  0  0  0  0
    0.7783   -2.2110   -5.3469 C   0  0  0  0  0  0  0  0  0  0  0  0
   -4.2722   -5.5360   -5.7996 C   0  0  0  0  0  0  0  0  0  0  0  0
   -3.4535   -2.8724  -11.2374 C   0  0  0  0  0  0  0  0  0  0  0  0
   -0.7583    2.0338   -1.2292 C   0  0  0  0  0  0  0  0  0  0  0  0
  1  2  1  0      
  5  6  1  0      
  6  1  1  0      
  2  7  1  0      
  8  9  1  0      
 12 13  1  0      
 13  8  1  0      
 12 14  1  0      
  3 14  1  0      
  9 15  1  0      
 16 17  1  0      
 20 21  1  0      
 21 16  1  0      
 17 22  1  0      
 10 23  1  0      
 24 25  1  0      
 28 29  1  0      
 29 24  1  0      
 25 30  1  0      
 28 31  1  0      
 18 31  1  0      
 11 32  1  0      
  5 33  1  0      
  4 34  1  0      
 27 35  1  0      
 26 36  1  0      
 36 37  1  0      
 19 38  1  0      
 25 26  1  0      
 28 27  1  0      
 26 27  1  0      
 17 18  1  0      
 18 19  1  0      
 20 19  1  0      
  9 10  1  0      
 10 11  1  0      
 12 11  1  0      
  2  3  1  0      
  3  4  1  0      
  4  5  1  0      
 15 20  1  0      
  8 39  1  0      
 16 40  1  0      
 24 41  1  0      
  1 42  1  0      
M  STY  1   1 SUP
M  SLB  1   1   1
M  SAL   1  1  39
M  SBL   1  1  42
M  SMT   1 Me
M  SBV   1 42   -8.2030    5.9183
M  STY  1   2 SUP
M  SLB  1   2   2
M  SAL   2  1  40
M  SBL   2  1  43
M  SMT   2 Me
M  SBV   2 43   -8.2033    5.9190
M  STY  1   3 SUP
M  SLB  1   3   3
M  SAL   3  1  41
M  SBL   3  1  44
M  SMT   3 Me
M  SBV   3 44   -8.2033    5.9190
M  STY  1   4 SUP
M  SLB  1   4   4
M  SAL   4  1  42
M  SBL   4  1  45
M  SMT   4 Me
M  SBV   4 45   -8.1219    5.7203
M  END
$$$$
