# Supplementary material for: Influence of Fucoidans on Hemostatic System
Source: MDPI journal article supplement (doi:10.3390/md11072444), 2013-07-12
Supplement: s4 [file s4]

marinedrugs-11-02444-s002.mol
  ChemDraw01201408372D

 42 45  0  0  0  0  0  0  0  0999 V2000
    2.0190    3.7378    0.0000 C   0  0  0  0  0  0  0  0  0  0  0  0
    1.6065    3.0234    0.0000 C   0  0  0  0  0  0  0  0  0  0  0  0
    2.3998    3.2501    0.0000 C   0  0  0  0  0  0  0  0  0  0  0  0
    3.1978    3.0234    0.0000 C   0  0  0  0  0  0  0  0  0  0  0  0
    3.6104    3.7378    0.0000 C   0  0  0  0  0  0  0  0  0  0  0  0
    2.8171    3.5112    0.0000 O   0  0  0  0  0  0  0  0  0  0  0  0
    1.6065    2.1984    0.0000 O   0  0  0  0  0  0  0  0  0  0  0  0
    0.4309    1.6960    0.0000 C   0  0  0  0  0  0  0  0  0  0  0  0
    0.0184    0.9815    0.0000 C   0  0  0  0  0  0  0  0  0  0  0  0
    0.8116    1.2082    0.0000 C   0  0  0  0  0  0  0  0  0  0  0  0
    1.6097    0.9815    0.0000 C   0  0  0  0  0  0  0  0  0  0  0  0
    2.0223    1.6960    0.0000 C   0  0  0  0  0  0  0  0  0  0  0  0
    1.2290    1.4693    0.0000 O   0  0  0  0  0  0  0  0  0  0  0  0
    2.0223    2.5210    0.0000 O   0  0  0  0  0  0  0  0  0  0  0  0
    0.0184    0.1565    0.0000 O   0  0  0  0  0  0  0  0  0  0  0  0
   -1.6712   -0.3906    0.0000 C   0  0  0  0  0  0  0  0  0  0  0  0
   -2.0837   -1.1051    0.0000 C   0  0  0  0  0  0  0  0  0  0  0  0
   -1.2905   -0.8784    0.0000 C   0  0  0  0  0  0  0  0  0  0  0  0
   -0.4924   -1.1051    0.0000 C   0  0  0  0  0  0  0  0  0  0  0  0
    0.0189   -0.4066    0.0000 C   0  0  0  0  0  0  0  0  0  0  0  0
   -0.8731   -0.6172    0.0000 O   0  0  0  0  0  0  0  0  0  0  0  0
   -2.0837   -1.9301    0.0000 O   0  0  0  0  0  0  0  0  0  0  0  0
    0.5981    0.4113    0.0000 O   0  0  0  0  0  0  0  0  0  0  0  0
   -3.1975   -2.5356    0.0000 C   0  0  0  0  0  0  0  0  0  0  0  0
   -3.6100   -3.2501    0.0000 C   0  0  0  0  0  0  0  0  0  0  0  0
   -2.8167   -3.0234    0.0000 C   0  0  0  0  0  0  0  0  0  0  0  0
   -2.0187   -3.2501    0.0000 C   0  0  0  0  0  0  0  0  0  0  0  0
   -1.6061   -2.5356    0.0000 C   0  0  0  0  0  0  0  0  0  0  0  0
   -2.3994   -2.7622    0.0000 O   0  0  0  0  0  0  0  0  0  0  0  0
   -3.6100   -4.0751    0.0000 O   0  0  0  0  0  0  0  0  0  0  0  0
   -1.6061   -1.7106    0.0000 O   0  0  0  0  0  0  0  0  0  0  0  0
    2.2046    1.2653    0.0000 O   0  0  0  0  0  0  0  0  0  0  0  0
    3.6104    4.5628    0.0000 C   0  0  0  0  0  0  0  0  0  0  0  0
    3.9947    3.2369    0.0000 O   0  0  0  0  0  0  0  0  0  0  0  0
   -1.2218   -3.0366    0.0000 O   0  0  0  0  0  0  0  0  0  0  0  0
   -3.2292   -3.7378    0.0000 O   0  0  0  0  0  0  0  0  0  0  0  0
   -3.2292   -4.5628    0.0000 C   0  0  0  0  0  0  0  0  0  0  0  0
    0.3045   -0.8916    0.0000 O   0  0  0  0  0  0  0  0  0  0  0  0
   -0.3661    1.4827    0.0000 C   0  0  0  0  0  0  0  0  0  0  0  0
   -2.4685   -0.6032    0.0000 C   0  0  0  0  0  0  0  0  0  0  0  0
   -3.9947   -2.7482    0.0000 C   0  0  0  0  0  0  0  0  0  0  0  0
    1.3032    3.3266    0.0000 C   0  0  0  0  0  0  0  0  0  0  0  0
  1  2  1  0      
  5  6  1  0      
  6  1  1  0      
  2  7  1  0      
  8  9  1  0      
 12 13  1  0      
 13  8  1  0      
 12 14  1  0      
  3 14  1  0      
  9 15  1  0      
 16 17  1  0      
 20 21  1  0      
 21 16  1  0      
 17 22  1  0      
 10 23  1  0      
 24 25  1  0      
 28 29  1  0      
 29 24  1  0      
 25 30  1  0      
 28 31  1  0      
 18 31  1  0      
 11 32  1  0      
  5 33  1  0      
  4 34  1  0      
 27 35  1  0      
 26 36  1  0      
 36 37  1  0      
 19 38  1  0      
 25 26  1  1      
 28 27  1  1      
 26 27  1  1      
 17 18  1  1      
 18 19  1  1      
 20 19  1  1      
  9 10  1  1      
 10 11  1  1      
 12 11  1  1      
  2  3  1  1      
  3  4  1  1      
  4  5  1  1      
 15 20  1  0      
  8 39  1  0      
 16 40  1  0      
 24 41  1  0      
  1 42  1  0      
M  STY  1   1 SUP
M  SLB  1   1   1
M  SAL   1  1  39
M  SBL   1  1  42
M  SMT   1 Me
M  SBV   1 42   -8.2030    5.9183
M  STY  1   2 SUP
M  SLB  1   2   2
M  SAL   2  1  40
M  SBL   2  1  43
M  SMT   2 Me
M  SBV   2 43   -8.2033    5.9190
M  STY  1   3 SUP
M  SLB  1   3   3
M  SAL   3  1  41
M  SBL   3  1  44
M  SMT   3 Me
M  SBV   3 44   -8.2033    5.9190
M  STY  1   4 SUP
M  SLB  1   4   4
M  SAL   4  1  42
M  SBL   4  1  45
M  SMT   4 Me
M  SBV   4 45   -8.1219    5.7203
M  END
