# Supplementary material for: Influence of Fucoidans on Hemostatic System
Source: MDPI journal article supplement (doi:10.3390/md11072444), 2013-07-12
Supplement: s5 [file s5]

marinedrugs-11-02444-s003.mol
  corina  04141405523D 1   1.00000     0.00000 
CORINA 3.49 0023  12.04.2013
 55 59  0  0  0  0  0  0  0  0999 V2000
   -1.0302    1.1043    0.7233 C   0  0  0  0  0  0  0  0  0  0  0  0
   -0.7487   -0.3933    0.5756 C   0  0  0  0  0  0  0  0  0  0  0  0
    0.0558   -0.6297   -0.7063 C   0  0  0  0  0  0  0  0  0  0  0  0
    1.3418    0.2006   -0.6493 C   0  0  0  0  0  0  0  0  0  0  0  0
    0.9796    1.6752   -0.4543 C   0  0  0  0  0  0  0  0  0  0  0  0
    0.2062    1.8207    0.7385 O   0  0  0  0  0  0  0  0  0  0  0  0
   -1.9848   -1.1065    0.5020 O   0  0  0  0  0  0  0  0  0  0  0  0
   -1.1364   -3.0637   -3.9466 C   0  0  0  0  0  0  0  0  0  0  0  0
   -0.5662   -4.4804   -4.0544 C   0  0  0  0  0  0  0  0  0  0  0  0
    0.9006   -4.4670   -3.6131 C   0  0  0  0  0  0  0  0  0  0  0  0
    0.9885   -3.9119   -2.1882 C   0  0  0  0  0  0  0  0  0  0  0  0
    0.3582   -2.5172   -2.1524 C   0  0  0  0  0  0  0  0  0  0  0  0
   -0.9954   -2.5959   -2.6037 O   0  0  0  0  0  0  0  0  0  0  0  0
    0.3862   -2.0158   -0.8145 O   0  0  0  0  0  0  0  0  0  0  0  0
   -0.6533   -4.9284   -5.4086 O   0  0  0  0  0  0  0  0  0  0  0  0
    1.4736   -6.5283   -7.2029 C   0  0  0  0  0  0  0  0  0  0  0  0
    2.0821   -7.9328   -7.1736 C   0  0  0  0  0  0  0  0  0  0  0  0
    3.2022   -7.9738   -6.1296 C   0  0  0  0  0  0  0  0  0  0  0  0
    2.6329   -7.5585   -4.7695 C   0  0  0  0  0  0  0  0  0  0  0  0
    2.0031   -6.1685   -4.8916 C   0  0  0  0  0  0  0  0  0  0  0  0
    0.9912   -6.1924   -5.9003 O   0  0  0  0  0  0  0  0  0  0  0  0
    2.6172   -8.2483   -8.4606 O   0  0  0  0  0  0  0  0  0  0  0  0
    1.4203   -5.7978   -3.6406 O   0  0  0  0  0  0  0  0  0  0  0  0
    7.2993   -8.7398   -6.4306 C   0  0  0  0  0  0  0  0  0  0  0  0
    7.8082  -10.1757   -6.2789 C   0  0  0  0  0  0  0  0  0  0  0  0
    7.0224  -10.8724   -5.1638 C   0  0  0  0  0  0  0  0  0  0  0  0
    5.5281  -10.8172   -5.4960 C   0  0  0  0  0  0  0  0  0  0  0  0
    5.1073   -9.3565   -5.6780 C   0  0  0  0  0  0  0  0  0  0  0  0
    5.8976   -8.7593   -6.7080 O   0  0  0  0  0  0  0  0  0  0  0  0
    9.1973  -10.1572   -5.9444 O   0  0  0  0  0  0  0  0  0  0  0  0
    3.7270   -9.3002   -6.0433 O   0  0  0  0  0  0  0  0  0  0  0  0
    1.1247   -5.6988   -0.5965 C   0  0  0  0  0  0  0  0  0  0  0  0
    0.2574   -6.7324    0.1269 C   0  0  0  0  0  0  0  0  0  0  0  0
    1.1617   -7.6802    0.9209 C   0  0  0  0  0  0  0  0  0  0  0  0
    2.0177   -6.8590    1.8900 C   0  0  0  0  0  0  0  0  0  0  0  0
    2.8169   -5.8206    1.0985 C   0  0  0  0  0  0  0  0  0  0  0  0
    1.9178   -4.9918    0.3591 O   0  0  0  0  0  0  0  0  0  0  0  0
    0.2850   -4.7769   -1.2944 O   0  0  0  0  0  0  0  0  0  0  0  0
    1.1707   -6.1948    2.8300 O   0  0  0  0  0  0  0  0  0  0  0  0
    2.2603    2.5039   -0.3363 C   0  0  0  0  0  0  0  0  0  0  0  0
    0.3571   -8.6030    1.6578 O   0  0  0  0  0  0  0  0  0  0  0  0
    2.0656    0.0443   -1.8715 O   0  0  0  0  0  0  0  0  0  0  0  0
    5.2804  -11.5395   -6.7039 O   0  0  0  0  0  0  0  0  0  0  0  0
    7.4400  -12.2354   -5.0645 O   0  0  0  0  0  0  0  0  0  0  0  0
    7.3362  -12.7806   -3.7477 C   0  0  0  0  0  0  0  0  0  0  0  0
    1.6380   -8.4994   -4.3608 O   0  0  0  0  0  0  0  0  0  0  0  0
   -0.6361   -6.0648    1.0201 O   0  0  0  0  0  0  0  0  0  0  0  0
   -1.8822    1.5819   -0.4543 C   0  0  0  0  0  0  0  0  0  0  0  0
   -0.3752   -2.1338   -4.8935 C   0  0  0  0  0  0  0  0  0  0  0  0
    2.5415   -5.5183   -7.6276 C   0  0  0  0  0  0  0  0  0  0  0  0
    7.5521   -7.9691   -5.1333 C   0  0  0  0  0  0  0  0  0  0  0  0
    3.6169   -4.9696    2.0508 C   0  0  0  0  0  0  0  0  0  0  0  0
    3.3753   -3.7904    2.1561 O   0  0  0  0  0  0  0  0  0  0  0  0
    4.5979   -5.5215    2.7821 O   0  0  0  0  0  0  0  0  0  0  0  0
    5.5968   -4.3159    4.0104 Na  0  0  0  0  0  0  0  0  0  0  0  0
  1  2  1  0      
  5  6  1  0      
  6  1  1  0      
  2  7  1  0      
  8  9  1  0      
 12 13  1  0      
 13  8  1  0      
 12 14  1  0      
  3 14  1  0      
  9 15  1  0      
 16 17  1  0      
 20 21  1  0      
 21 16  1  0      
 17 22  1  0      
 20 23  1  0      
 10 23  1  0      
 24 25  1  0      
 28 29  1  0      
 29 24  1  0      
 25 30  1  0      
 28 31  1  0      
 18 31  1  0      
 35 36  1  0      
 36 37  1  0      
 37 32  1  0      
 32 38  1  0      
 35 39  1  0      
 11 38  1  0      
  5 40  1  0      
 34 41  1  0      
  4 42  1  0      
 27 43  1  0      
 26 44  1  0      
 44 45  1  0      
 19 46  1  0      
 25 26  1  0      
 28 27  1  0      
 26 27  1  0      
 17 18  1  0      
 18 19  1  0      
 20 19  1  0      
  9 10  1  0      
 10 11  1  0      
 12 11  1  0      
  2  3  1  0      
  3  4  1  0      
  4  5  1  0      
 35 34  1  0      
 34 33  1  0      
 32 33  1  0      
 33 47  1  0      
  1 48  1  0      
  8 49  1  0      
 16 50  1  0      
 24 51  1  0      
 36 52  1  0      
 52 53  2  0      
 52 54  1  0      
 54 55  1  0      
M  STY  1   1 SUP
M  SLB  1   1   1
M  SAL   1  1  48
M  SBL   1  1  52
M  SMT   1 Me
M  SBV   1 52   -9.3034    5.8543
M  STY  1   2 SUP
M  SLB  1   2   2
M  SAL   2  1  49
M  SBL   2  1  53
M  SMT   2 Me
M  SBV   2 53   -9.3846    6.0523
M  STY  1   3 SUP
M  SLB  1   3   3
M  SAL   3  1  50
M  SBL   3  1  54
M  SMT   3 Me
M  SBV   3 54   -9.3848    6.0530
M  STY  1   4 SUP
M  SLB  1   4   4
M  SAL   4  1  51
M  SBL   4  1  55
M  SMT   4 Me
M  SBV   4 55   -9.3848    6.0530
M  STY  1   5 SUP
M  SLB  1   5   5
M  SAL   5  4  52  53  54  55
M  SBL   5  1  56
M  SMT   5 COONa
M  SBV   5 56   -8.1899    6.2375
M  END
$$$$
