# Supplementary material for: Influence of Fucoidans on Hemostatic System
Source: MDPI journal article supplement (doi:10.3390/md11072444), 2013-07-12
Supplement: s6 [file s6]

marinedrugs-11-02444-s003.mol
  ChemDraw01201408372D

 55 59  0  0  0  0  0  0  0  0999 V2000
    0.9819    3.7275    0.0000 C   0  0  0  0  0  0  0  0  0  0  0  0
    0.5694    3.0131    0.0000 C   0  0  0  0  0  0  0  0  0  0  0  0
    1.3626    3.2398    0.0000 C   0  0  0  0  0  0  0  0  0  0  0  0
    2.1607    3.0131    0.0000 C   0  0  0  0  0  0  0  0  0  0  0  0
    2.5733    3.7275    0.0000 C   0  0  0  0  0  0  0  0  0  0  0  0
    1.7800    3.5009    0.0000 O   0  0  0  0  0  0  0  0  0  0  0  0
    0.5694    2.1881    0.0000 O   0  0  0  0  0  0  0  0  0  0  0  0
   -0.6062    1.6857    0.0000 C   0  0  0  0  0  0  0  0  0  0  0  0
   -1.0187    0.9712    0.0000 C   0  0  0  0  0  0  0  0  0  0  0  0
   -0.2255    1.1979    0.0000 C   0  0  0  0  0  0  0  0  0  0  0  0
    0.5726    0.9712    0.0000 C   0  0  0  0  0  0  0  0  0  0  0  0
    0.9852    1.6857    0.0000 C   0  0  0  0  0  0  0  0  0  0  0  0
    0.1918    1.4590    0.0000 O   0  0  0  0  0  0  0  0  0  0  0  0
    0.9852    2.5107    0.0000 O   0  0  0  0  0  0  0  0  0  0  0  0
   -1.0187    0.1462    0.0000 O   0  0  0  0  0  0  0  0  0  0  0  0
   -2.2134   -0.3803    0.0000 C   0  0  0  0  0  0  0  0  0  0  0  0
   -2.6259   -1.0948    0.0000 C   0  0  0  0  0  0  0  0  0  0  0  0
   -1.8326   -0.8681    0.0000 C   0  0  0  0  0  0  0  0  0  0  0  0
   -1.0346   -1.0948    0.0000 C   0  0  0  0  0  0  0  0  0  0  0  0
   -0.6220   -0.3803    0.0000 C   0  0  0  0  0  0  0  0  0  0  0  0
   -1.4153   -0.6069    0.0000 O   0  0  0  0  0  0  0  0  0  0  0  0
   -2.6259   -1.9198    0.0000 O   0  0  0  0  0  0  0  0  0  0  0  0
   -0.6220    0.4447    0.0000 O   0  0  0  0  0  0  0  0  0  0  0  0
   -3.7396   -2.5253    0.0000 C   0  0  0  0  0  0  0  0  0  0  0  0
   -4.1521   -3.2398    0.0000 C   0  0  0  0  0  0  0  0  0  0  0  0
   -3.3589   -3.0131    0.0000 C   0  0  0  0  0  0  0  0  0  0  0  0
   -2.5608   -3.2398    0.0000 C   0  0  0  0  0  0  0  0  0  0  0  0
   -2.1482   -2.5253    0.0000 C   0  0  0  0  0  0  0  0  0  0  0  0
   -2.9415   -2.7519    0.0000 O   0  0  0  0  0  0  0  0  0  0  0  0
   -4.1521   -4.0648    0.0000 O   0  0  0  0  0  0  0  0  0  0  0  0
   -2.1482   -1.7003    0.0000 O   0  0  0  0  0  0  0  0  0  0  0  0
    1.1675    0.4300    0.0000 C   0  0  0  0  0  0  0  0  0  0  0  0
    1.5800   -0.2845    0.0000 C   0  0  0  0  0  0  0  0  0  0  0  0
    2.3781   -0.0754    0.0000 C   0  0  0  0  0  0  0  0  0  0  0  0
    3.1713   -0.2845    0.0000 C   0  0  0  0  0  0  0  0  0  0  0  0
    2.7589    0.4300    0.0000 C   0  0  0  0  0  0  0  0  0  0  0  0
    1.9607    0.2210    0.0000 O   0  0  0  0  0  0  0  0  0  0  0  0
    1.1675    1.2550    0.0000 O   0  0  0  0  0  0  0  0  0  0  0  0
    3.9682   -0.0709    0.0000 O   0  0  0  0  0  0  0  0  0  0  0  0
    2.5733    4.5525    0.0000 C   0  0  0  0  0  0  0  0  0  0  0  0
    2.7906   -0.7898    0.0000 O   0  0  0  0  0  0  0  0  0  0  0  0
    2.9576    3.2266    0.0000 O   0  0  0  0  0  0  0  0  0  0  0  0
   -1.7639   -3.0262    0.0000 O   0  0  0  0  0  0  0  0  0  0  0  0
   -3.7714   -3.7275    0.0000 O   0  0  0  0  0  0  0  0  0  0  0  0
   -3.7714   -4.5525    0.0000 C   0  0  0  0  0  0  0  0  0  0  0  0
   -0.2377   -0.8812    0.0000 O   0  0  0  0  0  0  0  0  0  0  0  0
    0.7831   -0.0709    0.0000 O   0  0  0  0  0  0  0  0  0  0  0  0
    0.2660    3.3162    0.0000 C   0  0  0  0  0  0  0  0  0  0  0  0
   -1.4032    1.4724    0.0000 C   0  0  0  0  0  0  0  0  0  0  0  0
   -3.0106   -0.5929    0.0000 C   0  0  0  0  0  0  0  0  0  0  0  0
   -4.5368   -2.7379    0.0000 C   0  0  0  0  0  0  0  0  0  0  0  0
    3.1566    0.4019    0.0000 C   0  0  0  0  0  0  0  0  0  0  0  0
    2.3597    0.1884    0.0000 O   0  0  0  0  0  0  0  0  0  0  0  0
    3.7400   -0.1814    0.0000 O   0  0  0  0  0  0  0  0  0  0  0  0
    4.5368    0.0321    0.0000 Na  0  0  0  0  0  0  0  0  0  0  0  0
  1  2  1  0      
  5  6  1  0      
  6  1  1  0      
  2  7  1  0      
  8  9  1  0      
 12 13  1  0      
 13  8  1  0      
 12 14  1  0      
  3 14  1  0      
  9 15  1  0      
 16 17  1  0      
 20 21  1  0      
 21 16  1  0      
 17 22  1  0      
 20 23  1  0      
 10 23  1  0      
 24 25  1  0      
 28 29  1  0      
 29 24  1  0      
 25 30  1  0      
 28 31  1  0      
 18 31  1  0      
 35 36  1  0      
 36 37  1  0      
 37 32  1  0      
 32 38  1  0      
 35 39  1  0      
 11 38  1  0      
  5 40  1  0      
 34 41  1  0      
  4 42  1  0      
 27 43  1  0      
 26 44  1  0      
 44 45  1  0      
 19 46  1  0      
 25 26  1  1      
 28 27  1  1      
 26 27  1  1      
 17 18  1  1      
 18 19  1  1      
 20 19  1  1      
  9 10  1  1      
 10 11  1  1      
 12 11  1  1      
  2  3  1  1      
  3  4  1  1      
  4  5  1  1      
 35 34  1  1      
 34 33  1  1      
 32 33  1  1      
 33 47  1  0      
  1 48  1  0      
  8 49  1  0      
 16 50  1  0      
 24 51  1  0      
 36 52  1  0      
 52 53  2  0      
 52 54  1  0      
 54 55  1  0      
M  STY  1   1 SUP
M  SLB  1   1   1
M  SAL   1  1  48
M  SBL   1  1  52
M  SMT   1 Me
M  SBV   1 52   -9.3034    5.8543
M  STY  1   2 SUP
M  SLB  1   2   2
M  SAL   2  1  49
M  SBL   2  1  53
M  SMT   2 Me
M  SBV   2 53   -9.3846    6.0523
M  STY  1   3 SUP
M  SLB  1   3   3
M  SAL   3  1  50
M  SBL   3  1  54
M  SMT   3 Me
M  SBV   3 54   -9.3848    6.0530
M  STY  1   4 SUP
M  SLB  1   4   4
M  SAL   4  1  51
M  SBL   4  1  55
M  SMT   4 Me
M  SBV   4 55   -9.3848    6.0530
M  STY  1   5 SUP
M  SLB  1   5   5
M  SAL   5  4  52  53  54  55
M  SBL   5  1  56
M  SMT   5 COONa
M  SBV   5 56   -8.1899    6.2375
M  END
