# Supplementary material for: Influence of Fucoidans on Hemostatic System
Source: MDPI journal article supplement (doi:10.3390/md11072444), 2013-07-12
Supplement: s7 [file s7]

marinedrugs-11-02444-s004.mol
  ChemDraw04141417502D

 89 92  0  0  0  0  0  0  0  0999 V2000
    1.6855    4.1968    0.0000 C   0  0  0  0  0  0  0  0  0  0  0  0
    1.2731    3.4824    0.0000 C   0  0  0  0  0  0  0  0  0  0  0  0
    2.0663    3.7091    0.0000 C   0  0  0  0  0  0  0  0  0  0  0  0
    3.2766    4.1968    0.0000 C   0  0  0  0  0  0  0  0  0  0  0  0
    2.4835    3.9703    0.0000 O   0  0  0  0  0  0  0  0  0  0  0  0
    0.0976    2.1552    0.0000 C   0  0  0  0  0  0  0  0  0  0  0  0
   -0.3147    1.4410    0.0000 C   0  0  0  0  0  0  0  0  0  0  0  0
    0.4783    1.6677    0.0000 C   0  0  0  0  0  0  0  0  0  0  0  0
    1.2763    1.4410    0.0000 C   0  0  0  0  0  0  0  0  0  0  0  0
    1.6888    2.1552    0.0000 C   0  0  0  0  0  0  0  0  0  0  0  0
    0.8957    1.9287    0.0000 O   0  0  0  0  0  0  0  0  0  0  0  0
    1.6888    2.9801    0.0000 O   0  0  0  0  0  0  0  0  0  0  0  0
   -1.5091    0.0897    0.0000 C   0  0  0  0  0  0  0  0  0  0  0  0
   -1.9216   -0.6247    0.0000 C   0  0  0  0  0  0  0  0  0  0  0  0
   -1.1285   -0.3981    0.0000 C   0  0  0  0  0  0  0  0  0  0  0  0
   -0.3305   -0.6247    0.0000 C   0  0  0  0  0  0  0  0  0  0  0  0
    0.0819    0.0897    0.0000 C   0  0  0  0  0  0  0  0  0  0  0  0
   -0.7112   -0.1370    0.0000 O   0  0  0  0  0  0  0  0  0  0  0  0
    0.0819    0.9145    0.0000 O   0  0  0  0  0  0  0  0  0  0  0  0
   -3.0352   -2.0550    0.0000 C   0  0  0  0  0  0  0  0  0  0  0  0
   -3.4476   -2.7693    0.0000 C   0  0  0  0  0  0  0  0  0  0  0  0
   -2.6545   -2.5427    0.0000 C   0  0  0  0  0  0  0  0  0  0  0  0
   -1.8566   -2.7693    0.0000 C   0  0  0  0  0  0  0  0  0  0  0  0
   -1.4441   -2.0550    0.0000 C   0  0  0  0  0  0  0  0  0  0  0  0
   -2.2372   -2.2817    0.0000 O   0  0  0  0  0  0  0  0  0  0  0  0
   -1.4441   -1.2301    0.0000 O   0  0  0  0  0  0  0  0  0  0  0  0
    2.9679    3.4676    0.0000 C   0  0  0  0  0  0  0  0  0  0  0  0
    1.0694   -0.6065    0.0000 O   0  0  0  0  0  0  0  0  0  0  0  0
    0.6569    0.1079    0.0000 S   0  0  0  0  0  0  0  0  0  0  0  0
    1.3713    0.5204    0.0000 O   0  0  0  0  0  0  0  0  0  0  0  0
   -0.0576   -0.3046    0.0000 O   0  0  0  0  0  0  0  0  0  0  0  0
    0.2444    0.8224    0.0000 O   0  0  0  0  0  0  0  0  0  0  0  0
   -0.5806    0.8224    0.0000 Na  0  0  0  0  0  0  0  0  0  0  0  0
   -4.4157   -3.1131    0.0000 O   0  0  0  0  0  0  0  0  0  0  0  0
   -4.7560   -2.5236    0.0000 S   0  0  0  0  0  0  0  0  0  0  0  0
   -4.1665   -2.1833    0.0000 O   0  0  0  0  0  0  0  0  0  0  0  0
   -5.3454   -2.8640    0.0000 O   0  0  0  0  0  0  0  0  0  0  0  0
   -5.0963   -1.9343    0.0000 O   0  0  0  0  0  0  0  0  0  0  0  0
   -5.7769   -1.9343    0.0000 Na  0  0  0  0  0  0  0  0  0  0  0  0
   -0.6992    1.9420    0.0000 C   0  0  0  0  0  0  0  0  0  0  0  0
   -1.1403    1.4411    0.0000 O   0  0  0  0  0  0  0  0  0  0  0  0
   -1.4806    2.0305    0.0000 S   0  0  0  0  0  0  0  0  0  0  0  0
   -0.8911    2.3709    0.0000 O   0  0  0  0  0  0  0  0  0  0  0  0
   -2.0700    1.6902    0.0000 O   0  0  0  0  0  0  0  0  0  0  0  0
   -1.8209    2.6199    0.0000 O   0  0  0  0  0  0  0  0  0  0  0  0
   -2.5015    2.6199    0.0000 Na  0  0  0  0  0  0  0  0  0  0  0  0
    0.9699    3.7856    0.0000 C   0  0  0  0  0  0  0  0  0  0  0  0
   -3.8323   -2.2676    0.0000 C   0  0  0  0  0  0  0  0  0  0  0  0
    2.7606    1.4202    0.0000 O   0  0  0  0  0  0  0  0  0  0  0  0
    2.3481    2.1347    0.0000 S   0  0  0  0  0  0  0  0  0  0  0  0
    3.0626    2.5472    0.0000 O   0  0  0  0  0  0  0  0  0  0  0  0
    1.6337    1.7222    0.0000 O   0  0  0  0  0  0  0  0  0  0  0  0
    1.9356    2.8492    0.0000 O   0  0  0  0  0  0  0  0  0  0  0  0
    1.1106    2.8492    0.0000 Na  0  0  0  0  0  0  0  0  0  0  0  0
   -2.0642   -4.8168    0.0000 O   0  0  0  0  0  0  0  0  0  0  0  0
   -2.4767   -4.1023    0.0000 S   0  0  0  0  0  0  0  0  0  0  0  0
   -1.7623   -3.6898    0.0000 O   0  0  0  0  0  0  0  0  0  0  0  0
   -3.1912   -4.5148    0.0000 O   0  0  0  0  0  0  0  0  0  0  0  0
   -2.8892   -3.3878    0.0000 O   0  0  0  0  0  0  0  0  0  0  0  0
   -3.7142   -3.3878    0.0000 Na  0  0  0  0  0  0  0  0  0  0  0  0
    0.3044    3.1386    0.0000 O   0  0  0  0  0  0  0  0  0  0  0  0
   -0.0359    3.7280    0.0000 S   0  0  0  0  0  0  0  0  0  0  0  0
    0.5536    4.0683    0.0000 O   0  0  0  0  0  0  0  0  0  0  0  0
   -0.6253    3.3877    0.0000 O   0  0  0  0  0  0  0  0  0  0  0  0
   -0.3762    4.3175    0.0000 O   0  0  0  0  0  0  0  0  0  0  0  0
   -1.0568    4.3175    0.0000 Na  0  0  0  0  0  0  0  0  0  0  0  0
   -2.8895   -0.9682    0.0000 O   0  0  0  0  0  0  0  0  0  0  0  0
   -3.2298   -0.3788    0.0000 S   0  0  0  0  0  0  0  0  0  0  0  0
   -2.6404   -0.0385    0.0000 O   0  0  0  0  0  0  0  0  0  0  0  0
   -3.8192   -0.7191    0.0000 O   0  0  0  0  0  0  0  0  0  0  0  0
   -3.5701    0.2106    0.0000 O   0  0  0  0  0  0  0  0  0  0  0  0
   -4.2507    0.2106    0.0000 Na  0  0  0  0  0  0  0  0  0  0  0  0
   -0.5380   -2.6718    0.0000 O   0  0  0  0  0  0  0  0  0  0  0  0
   -0.9505   -1.9573    0.0000 S   0  0  0  0  0  0  0  0  0  0  0  0
   -0.2360   -1.5448    0.0000 O   0  0  0  0  0  0  0  0  0  0  0  0
   -1.6650   -2.3698    0.0000 O   0  0  0  0  0  0  0  0  0  0  0  0
   -1.3630   -1.2428    0.0000 O   0  0  0  0  0  0  0  0  0  0  0  0
   -2.1880   -1.2428    0.0000 Na  0  0  0  0  0  0  0  0  0  0  0  0
   -2.3063   -0.1229    0.0000 C   0  0  0  0  0  0  0  0  0  0  0  0
    3.6335    4.8168    0.0000 O   0  0  0  0  0  0  0  0  0  0  0  0
    5.7769    4.4043    0.0000 C   0  0  0  0  0  0  0  0  0  0  0  0
    5.0624    4.8168    0.0000 C   0  0  0  0  0  0  0  0  0  0  0  0
    4.3480    4.4043    0.0000 C   0  0  0  0  0  0  0  0  0  0  0  0
   -3.3737   -3.4171    0.0000 O   0  0  0  0  0  0  0  0  0  0  0  0
   -3.7708   -3.0200    0.0000 S   0  0  0  0  0  0  0  0  0  0  0  0
   -3.3737   -2.6229    0.0000 O   0  0  0  0  0  0  0  0  0  0  0  0
   -4.1679   -3.4171    0.0000 O   0  0  0  0  0  0  0  0  0  0  0  0
   -4.1679   -2.6229    0.0000 O   0  0  0  0  0  0  0  0  0  0  0  0
   -4.7102   -2.7683    0.0000 Na  0  0  0  0  0  0  0  0  0  0  0  0
  1  2  1  0      
  4  5  1  0      
  5  1  1  0      
  6  7  1  0      
 10 11  1  0      
 11  6  1  0      
 10 12  1  0      
  3 12  1  0      
 13 14  1  0      
 17 18  1  0      
 18 13  1  0      
 17 19  1  0      
  8 19  1  0      
 20 21  1  0      
 24 25  1  0      
 25 20  1  0      
 24 26  1  0      
 15 26  1  0      
 21 22  1  1      
 24 23  1  1      
 22 23  1  1      
 14 15  1  1      
 15 16  1  1      
 17 16  1  1      
  7  8  1  1      
  8  9  1  1      
 10  9  1  1      
  2  3  1  1      
  3 27  1  1      
  4 27  1  1      
  9 28  1  0      
 28 29  1  0      
 29 30  2  0      
 29 31  2  0      
 29 32  1  0      
 32 33  1  0      
 34 35  1  0      
 35 36  2  0      
 35 37  2  0      
 35 38  1  0      
 38 39  1  0      
 21 34  1  0      
  6 40  1  0      
 41 42  1  0      
 42 43  2  0      
 42 44  2  0      
 42 45  1  0      
 45 46  1  0      
  7 41  1  0      
  1 47  1  0      
 20 48  1  0      
 27 49  1  0      
 49 50  1  0      
 50 51  2  0      
 50 52  2  0      
 50 53  1  0      
 53 54  1  0      
 23 55  1  0      
 55 56  1  0      
 56 57  2  0      
 56 58  2  0      
 56 59  1  0      
 59 60  1  0      
 61 62  1  0      
 62 63  2  0      
 62 64  2  0      
 62 65  1  0      
 65 66  1  0      
  2 61  1  0      
 67 68  1  0      
 68 69  2  0      
 68 70  2  0      
 68 71  1  0      
 71 72  1  0      
 14 67  1  0      
 16 73  1  0      
 73 74  1  0      
 74 75  2  0      
 74 76  2  0      
 74 77  1  0      
 77 78  1  0      
 13 79  1  0      
  4 80  1  0      
 80 83  1  0      
 81 82  1  0      
 82 83  1  0      
 84 85  1  0      
 85 86  2  0      
 85 87  2  0      
 85 88  1  0      
 88 89  1  0      
 22 84  1  0      
M  STY  1   1 SUP
M  SLB  1   1   1
M  SAL   1  6  28  29  30  31  32  33
M  SBL   1  1  31
M  SMT   1 OSO3Na
M  SBV   1 31   -7.2418    3.9779
M  STY  1   2 SUP
M  SLB  1   2   2
M  SAL   2  6  34  35  36  37  38  39
M  SBL   2  1  42
M  SMT   2 OSO3Na
M  SBV   2 42   -8.0029    5.6816
M  STY  1   3 SUP
M  SLB  1   3   3
M  SAL   3  1  40
M  SBL   3  1  43
M  SMT   3 Me
M  SBV   3 43   -7.8317    5.8121
M  STY  1   4 SUP
M  SLB  1   4   4
M  SAL   4  6  41  42  43  44  45  46
M  SBL   4  1  49
M  SMT   4 OSO3Na
M  SBV   4 49   -7.8604    6.0255
M  STY  1   5 SUP
M  SLB  1   5   5
M  SAL   5  1  47
M  SBL   5  1  50
M  SMT   5 Me
M  SBV   5 50   -7.7505    5.6142
M  STY  1   6 SUP
M  SLB  1   6   6
M  SAL   6  1  48
M  SBL   6  1  51
M  SMT   6 Me
M  SBV   6 51   -7.8319    5.8128
M  STY  1   7 SUP
M  SLB  1   7   7
M  SAL   7  6  49  50  51  52  53  54
M  SBL   7  1  52
M  SMT   7 OSO3Na
M  SBV   7 52   -7.2422    3.9780
M  STY  1   8 SUP
M  SLB  1   8   8
M  SAL   8  6  55  56  57  58  59  60
M  SBL   8  1  58
M  SMT   8 OSO3Na
M  SBV   8 58   -7.2425    3.9780
M  STY  1   9 SUP
M  SLB  1   9   9
M  SAL   9  6  61  62  63  64  65  66
M  SBL   9  1  69
M  SMT   9 OSO3Na
M  SBV   9 69   -8.0035    5.6815
M  STY  1  10 SUP
M  SLB  1  10  10
M  SAL  10  6  67  68  69  70  71  72
M  SBL  10  1  75
M  SMT  10 OSO3Na
M  SBV  10 75   -8.0027    5.6818
M  STY  1  11 SUP
M  SLB  1  11  11
M  SAL  11  6  73  74  75  76  77  78
M  SBL  11  1  76
M  SMT  11 OSO3Na
M  SBV  11 76   -7.2423    3.9783
M  STY  1  12 SUP
M  SLB  1  12  12
M  SAL  12  1  79
M  SBL  12  1  82
M  SMT  12 Me
M  SBV  12 82   -7.8320    5.8128
M  STY  1  13 SUP
M  SLB  1  13  13
M  SAL  13  4  80  81  82  83
M  SBL  13  1  83
M  SMT  13 OPr
M  SBV  13 83   -6.6780    6.6454
M  STY  1  14 SUP
M  SLB  1  14  14
M  SAL  14  6  84  85  86  87  88  89
M  SBL  14  1  92
M  SMT  14 OSO3Na
M  SBV  14 92   -7.7541    5.1511
M  STY  1  15 SRU
M  SLB  1  15  15
M  SCN  1  15 HT 
M  SAL  15 15  73  67  40  79  28  41   6   7   8   9  10  11  13  14  15
M  SAL  15  5  16  17  18  19  26
M  SBL  15  2   7  17
M  SMT  15 3
M  SDI  15  4    1.2764    2.5677    2.1013    2.5677
M  SDI  15  4   -1.0317   -1.6425   -1.8565   -1.6425
M  END
